# Supplementary material for: A New Score to Predict the Resectability of Pancreatic Adenocarcinoma: The BACAP Score
Source: MDPI journal article supplement (doi:10.3390/cancers12040783), 2020-03-25
Supplement: s1 [file s1]

# Supplementary Materials: A New Score to Predict the Resectability of Pancreatic Adenocarcinoma: The BACAP Score

Charlotte Maulat, Cindy Canivet, Célia Touraine, Sophie Gourgou, Bertrand Napoleon, Laurent Palazzo, Nicolas Flori, Guillaume Piessen, Pierre Guibert, Stéphanie Truant, Eric Assenat, Louis Buscail, Barbara Bournet and Fabrice Muscari

Table S1. Clinico-radiological and biological data collected.

| Socio-demographic data    |                                    |                                        |
|---------------------------|------------------------------------|----------------------------------------|
| Gender                    | Educational level                  | Occupation                             |
| Male                      | No diploma                         | Farmer                                 |
| Female                    | General Certificate of Education   | Artisan, storekeeper                   |
| Age                       | Vocational diploma                 | Executive, higher education profession |
|                           | Vocational training certificate    | Intermediate level occupation          |
|                           | Baccalaureate (SAT)                | Employee                               |
|                           | Baccalaureate (SAT) +2             | Manual worker                          |
|                           | Educational certificate            | Retired                                |
|                           | Other                              | No professional activity               |
|                           |                                    | Other                                  |
| Medical history           |                                    |                                        |
| Smoking history           | Alcohol consumption                | Family history of cancer               |
| Non-smoker                | Non consumer                       | Yes                                    |
| Former smoker             | Former consumer                    | No                                     |
| Current smoker            | Current consumer                   |                                        |
| Other pancreatic diseases | History of diabetes                |                                        |
| Yes                       | Yes                                |                                        |
| No                        | No                                 |                                        |
| Symptoms on diagnosis     |                                    |                                        |
| Abdominal pain            | Jaundice                           | Chronic pancreatitis                   |
| Yes                       | Yes                                | Yes                                    |
| No                        | No                                 | No                                     |
| Random                    | Weight loss                        | Recent diabetes                        |
| Yes                       | Yes                                | Yes                                    |
| No                        | No                                 | No                                     |
| Anorexia                  | Acute pancreatitis                 | Gastrointestinal hemorrhage            |
| Yes                       | Yes                                | Yes                                    |
| No                        | No                                 | No                                     |
| Biological anomaly        | Upper gastrointestinal obstruction | Arterial or venous thrombosis          |
| Yes                       | Yes                                | Yes                                    |
| No                        | No                                 | No                                     |
| Ascites                   | Transit disorders                  | Cholestatic syndrome                   |
| Yes                       | Yes                                | Yes                                    |
| No                        | No                                 | No                                     |
| Cholecystitis             | Fever                              | WHO performance status                 |
| Yes                       | Yes                                | 0                                      |
| No                        | No                                 | 1                                      |
| Usual BMI                 | Current weight                     | 2                                      |
| Current BMI               | Usual weight                       | 3                                      |
| Biliary drainage          |                                    |                                        |
| Biliary drainage          | Percutaneous drainage              | Endoscopic drain                       |

|                                                                                                                   |                                                    |                                                       |
|-------------------------------------------------------------------------------------------------------------------|----------------------------------------------------|-------------------------------------------------------|
| Yes                                                                                                               | Yes                                                | Metallic                                              |
| No                                                                                                                | No                                                 | Plastic                                               |
| ERCP                                                                                                              | <b>Radiological drain</b>                          | Drain                                                 |
| Yes                                                                                                               | Metallic                                           |                                                       |
| No                                                                                                                | Plastic                                            |                                                       |
|                                                                                                                   | Drain                                              |                                                       |
| <b>Description and characteristics of the pancreatic disease and the tumor (CT Scan or Endoscopic ultrasound)</b> |                                                    |                                                       |
| <b>Location of the tumor</b>                                                                                      | <b>Maximal tumor size (mm)</b>                     | <b>Type of initial imaging</b>                        |
| <b>Head</b>                                                                                                       | <b>Conclusion of the paraclinical examinations</b> | Chest CT scan                                         |
| <b>Isthmus</b>                                                                                                    | Resectable                                         | Abdominal CT scan                                     |
| <b>Body</b>                                                                                                       | Potentially resectable                             | Endoscopic ultrasound                                 |
| <b>Tail</b>                                                                                                       | Locally advanced                                   | <b>IPMN</b>                                           |
| <b>Multiple</b>                                                                                                   | Metastatic                                         | Yes                                                   |
|                                                                                                                   |                                                    | No                                                    |
| <b>Biological analysis on diagnosis</b>                                                                           |                                                    |                                                       |
| <b>Hemoglobin (g/dl)</b>                                                                                          | INR                                                | Gamma-GT (IU/l)                                       |
| <b>Leucocytes (G/l)</b>                                                                                           | Albumin (g/l)                                      | Alkaline Phosphatase (IU/l)                           |
| <b>Neutrophils (G/l)</b>                                                                                          | AST (IU/l)                                         | Total bilirubin (μmol/l)                              |
| <b>Platelets (G/l)</b>                                                                                            | ALT (IU/l)                                         | Creatinine (μmol/l)                                   |
| <b>CA 19-9 (IU/ml)</b>                                                                                            | CEA (ng/ml)                                        |                                                       |
| <b>Anatomopathological analysis</b>                                                                               |                                                    |                                                       |
| <b>Puncture site</b>                                                                                              | <b>Immunocytochemistry</b>                         | <b>Immunohistochemistry</b>                           |
| <b>Primary tumor</b>                                                                                              | Yes                                                | Yes                                                   |
| <b>Liver</b>                                                                                                      | No                                                 | No                                                    |
| <b>Node</b>                                                                                                       |                                                    |                                                       |
| <b>Another metastasis</b>                                                                                         |                                                    |                                                       |
| <b>Multiple</b>                                                                                                   |                                                    |                                                       |
| <b>Treatment</b>                                                                                                  |                                                    |                                                       |
| <b>Resectable group treatment (surgery and after surgery)</b>                                                     |                                                    |                                                       |
| <b>Type of surgery</b>                                                                                            | <b>TNM staging</b>                                 | <b>Clavien-Dindo classification</b>                   |
| Whipple procedure                                                                                                 | Ia                                                 | Grade I                                               |
| Left pancreatectomy without splenic preservation                                                                  | Ib                                                 | Grade II                                              |
| Left pancreatectomy with splenic preservation                                                                     | IIa                                                | Grade IIIa                                            |
| Pancreatic fistula                                                                                                | IIb                                                | Grade IIIb                                            |
| Yes                                                                                                               | III                                                | Grade IVa                                             |
| No                                                                                                                | IV                                                 | Grade IVb                                             |
|                                                                                                                   |                                                    | Grade V                                               |
| <b>Locally advanced group treatment (type of chemotherapy)</b>                                                    |                                                    |                                                       |
| <b>Metastatic group treatment (type of chemotherapy)</b>                                                          |                                                    |                                                       |
| <b>Delays (days)</b>                                                                                              |                                                    |                                                       |
| <b>Between symptoms and first radiological exam</b>                                                               | Between biopsy and surgery                         | Between biopsy and first line chemotherapy            |
| <b>Between symptoms and anatomopathological analysis</b>                                                          | Between symptoms and first line chemotherapy       | Between MTM inclusion and surgery                     |
| <b>Between symptoms and surgery</b>                                                                               | Between MTM inclusion and first line chemotherapy  | Between first line of chemotherapy and tumor progress |

BMI: Body Mass Index, IPMN: intraductal papillary mucinous neoplasm, ERCP: Endoscopic Retrograde Cholangiopancreatography, CT scan: Computed Tomography scan, IPMN: intraductal papillary mucinous neoplasm, MTM: Multidisciplinary Team Meeting, WHO: World Health Organization, AST: Aspartate aminotransferase, ALT: Alanine aminotransferase, CEA: Carcinoembryonic antigen, Ca 19-9: Carbohydrate antigen 19-9.
